# Supplementary material for: MicroRNA-9 promotes tumor metastasis via repressing E-cadherin in esophageal squamous cell carcinoma
Source: PubMed Central journal article supplement (PMC4294333; doi:10.18632/oncotarget.2581), 2014-10-31
Supplement: oncotarget-05-11669-s001.pdf [file oncotarget-05-11669-s001.pdf]

## SUPPLEMENTARY DATA AND TABLE

## Primers and sequences

|                                              |                                         |
|----------------------------------------------|-----------------------------------------|
| <b>Primers:</b>                              |                                         |
| E-cadherin                                   | Forward: TGCCAGAAAATGAAAAGG             |
|                                              | Reverse: GTGTATGTGGCAATGCGTTC           |
| GAPDH                                        | Forward: CATGAGAAGTATGACAACAGCCT        |
|                                              | Reverse: AGTCCTTCCACGATACCAAAGT         |
| <b>Cloning primers for luciferase assay:</b> | Forward: TCATACTAGTAAGTGATCCTCCCATCTTGG |
|                                              | Reverse: GAATAAGCTTCAAACCACGGATCTTGTGTC |
| <b>predicted miR-9 binding sequence:</b>     |                                         |
| CDH1 3' UTR                                  | GCCUAAAGUGCUGCAGCCAAAGAC                |
| miR-9                                        | AGUAUGUCGAUCUAUUGGUUCU                  |

**An 819-bp fragment of CDH1 3'-UTR containing the putative binding site of miR-9 cloned into pMIR-REPORT vector**

aagtatcctcccatcttggcctcccagagtattgggattacagacatgagccactgcacctgccagctcccactccctgccatttttaagagacagttcgtccat  
cgcccaggcctgggatgcagtgatgatcatagctcactgtaacctcaactctggggctcaagcagttctcccaccagcctctttttttttgtacagatggggcttgc  
gttgcccaagctggctttaaactcctggcctcaagcaatccttctgcttggcccccaagtctgggattgtggcctgagctgctgtgccagcctccatgttttaatacaactc  
tcactctgaattcagttgcttggccaagatagggtctctgatgcagaattattgggctcttttagggtaagaagttgtgtcttctgtctggccacatctgactaggattgtctactct  
gaagaccttaatggctccctcttcatctcctgagtatgtaactgcaatgggcagctatccagtgactgttctgagtaagtgtgtcattaatgtttattagctctgaagcaagagtga  
tatactccaggactagaatagtgctaaagtctgcagccaaagacagagcgggaactatgaaaagtgggcttggagatggcaggagagctgtcattgagcctggcaatttag  
caactgatgctgaggatgattgaggtgggtctacctcatctctgaaaattctggaaggaatggaggagtctcaacatgtgttctgacacaagatccgtggtttg

**Supplementary Table S1. Crosstable of miR-9 expression and protein expression of E-cadherin**

|                   |                 | miR-9 expression |              |       | R      | P    |
|-------------------|-----------------|------------------|--------------|-------|--------|------|
|                   |                 | Low, No (%)      | High, No (%) | Total |        |      |
| E-cadherin by IHC | Low expression  | 52(57.1)         | 39(42.9)     | 91    | -0.163 | 0.02 |
|                   | High expression | 91(72.8)         | 34(27.2)     | 125   |        |      |
